# Supplementary material for: Autophagy-related protein MoAtg14 is involved in differentiation, development and pathogenicity in the rice blast fungus Magnaporthe oryzae
Source: PubMed Central journal article supplement (PMC5220305; doi:10.1038/srep40018), 2017-01-09
Supplement: srep40018-s1.pdf [file srep40018-s1.pdf]

**Autophagy-related protein MoAtg14 is involved in differentiation, development and pathogenicity in the rice blast fungus *Magnaporthe oryzae***

Xiao-Hong Liu<sup>1</sup>, Ya-Hui Zhao<sup>1</sup>, Xue-Ming Zhu<sup>1</sup>, Xiao-Qing Zeng<sup>4</sup>, Lu-Yao Huang<sup>1</sup>,  
Bo Dong<sup>5</sup>, Zhen-Zhu Su<sup>1,3</sup>, Yao Wang<sup>1</sup>, Jian-Ping Lu<sup>2</sup>, Fu-Cheng Lin<sup>1\*</sup>

**Table S1 Primers in this study**

| Name         | Sequence (5'-3')                            |
|--------------|---------------------------------------------|
| ATG14up-1    | CAGTGTGATGAGGTTGGGA                         |
| ATG14up-2    | CATTCATTGTTGACCTCCACTAAAGGGCAGAGTAGTCAGGAAA |
| ATG14dn-1    | GGGCAAAGGAATAGAGTAGATGATAGAATTGTCCCCTGAGCCC |
| ATG14dn-2    | ACATCGTTTGTTCCTCCGTGA                       |
| ATG14-N1     | ACGTCGACTCCTGTGAATCTTCTGGGTG                |
| ATG14-N2     | CGTCTAGAGGGTGATAGCGTCCTGGTTG                |
| ATG14-C1     | CTTGGTCGTCGTCAATCTCG                        |
| ATG14-C2     | CTGTCCGCAGCCCTTGTTAG                        |
| ATG14pb-1    | ACGTCGACTCCTGTGAATCTTCTGGGTG                |
| ATG14pb-2    | AGGGCAGAGTAGTCAGGAAA                        |
| Atg14FL-F    | GAGCTGTACAAGTCTAGAATGTCATGCTATATCTGCGG      |
| Atg14FL-R    | CTGCAGGTGCGACTCTAGAAGTCCAAGCATCATCCTCCA     |
| ATG14N-F     | GCTCTAGAATGTCATGCTATATCTGCGG                |
| ATG14N-R     | AATCTAGATGCAGCCTTGCGAGCTGCGG                |
| ATG14CCD-F   | AACCCGGGATGCGCTCATCCCCGCAGCTCG              |
| ATG14CCD-R   | AGGTCGACATCCCAGTCGGCCCTGGTTG                |
| ATG14C-F     | AACCCGGGAATATTGCGGCAACCAGGGC                |
| ATG14C-R     | AGTCTAGAAGTCCAAGCATCATCCTCCA                |
| ATG6-BDF     | CATGGAGGCCGAATTCATGATGTTTTGCCAAAAATGCCGGAC  |
| ATG6-BDR     | GCAGGTCGACGGATCCCTTAGGTCGAGCTTGAGCCAAAACCT  |
| ATG6CCD-BDF  | CATGGAGGCCGAATTCATGGTTCGAAGGCCTGCGCAAGCGCCT |
| ATG6CCD-BDR  | GCAGGTCGACGGATCCATACACGTTTGTCCGCTGCAGAGACT  |
| ATG14-ADF    | GGAGGCCAGTGAATTCATGTCATGCTATATCTGCGGACGCGG  |
| ATG14-ADR    | CGAGCTCGATGGATCCTCAAGTCCAAGCATCATCCTCCAGCA  |
| ATG14CCD-ADF | GGAGGCCAGTGAATTCATGCGCTCATCCCCGCAGCTCG      |
| ATG14CCD-ADR | CGAGCTCGATGGATCCATCCCAGTCGGCCCTGGTTG        |
| ATG14N-ADF   | GGAGGCCAGTGAATTCATGTCATGCTATATCTGCGGACGCGG  |
| ATG14N-ADR   | CGAGCTCGATGGATCCTGCAGCCTTGCGAGCTGCGG        |
| ATG14C-ADF   | GGAGGCCAGTGAATTCATGAATATTGCGGCAACCAGGGC     |
| ATG14C-ADR   | CGAGCTCGATGGATCCTCAAGTCCAAGCATCATCCTCCAGCA  |
| FgAtg14C-F   | CCCGGGAAGTCTAGAATGGACTGTGATATCTGTCATC       |
| FgAtg14C-R   | CAGGTCGACTCTAGATCATCTATTCTTGACCCTCATC       |
| TrAtg14C-F   | CCCGGGAAGTCTAGAATGGAATGCGACATCTGCCACC       |
| TrAtg14C-R   | CAGGTCGACTCTAGATCATCTGCTCTTGACCCTCATC       |

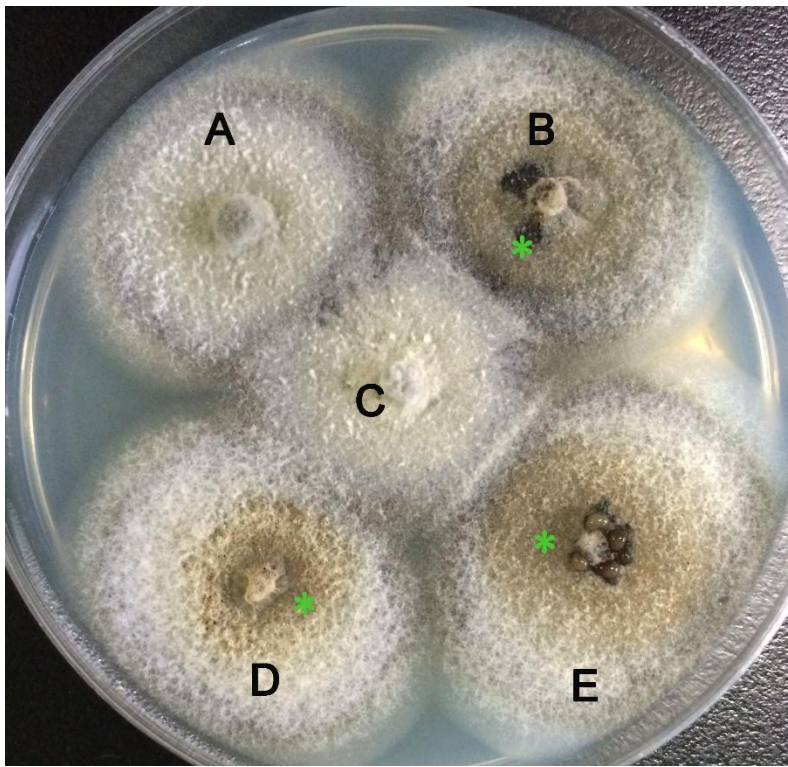

FgAtg14 to the  $\Delta MoAtg14$  mutant

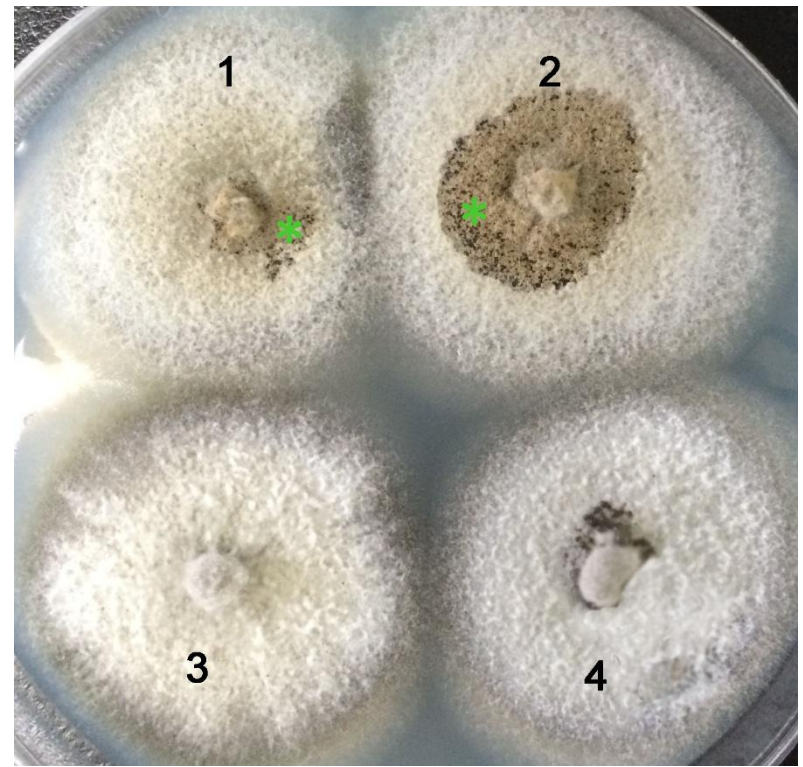

TrAtg14 to the  $\Delta MoAtg14$  mutant

### Figure S1 Complementation assays of FgAtg14 and TrAtg14

Left, introduction FgAtg14 to the  $\Delta MoAtg14$  mutant, A & C are recovered, and similar to the wild type. Right, introduction TrAtg14 to the  $\Delta MoAtg14$  mutant, 3 & 4 are recovered, and similar to the wild type. \* the typical characteristics of the  $\Delta MoAtg14$  mutant.

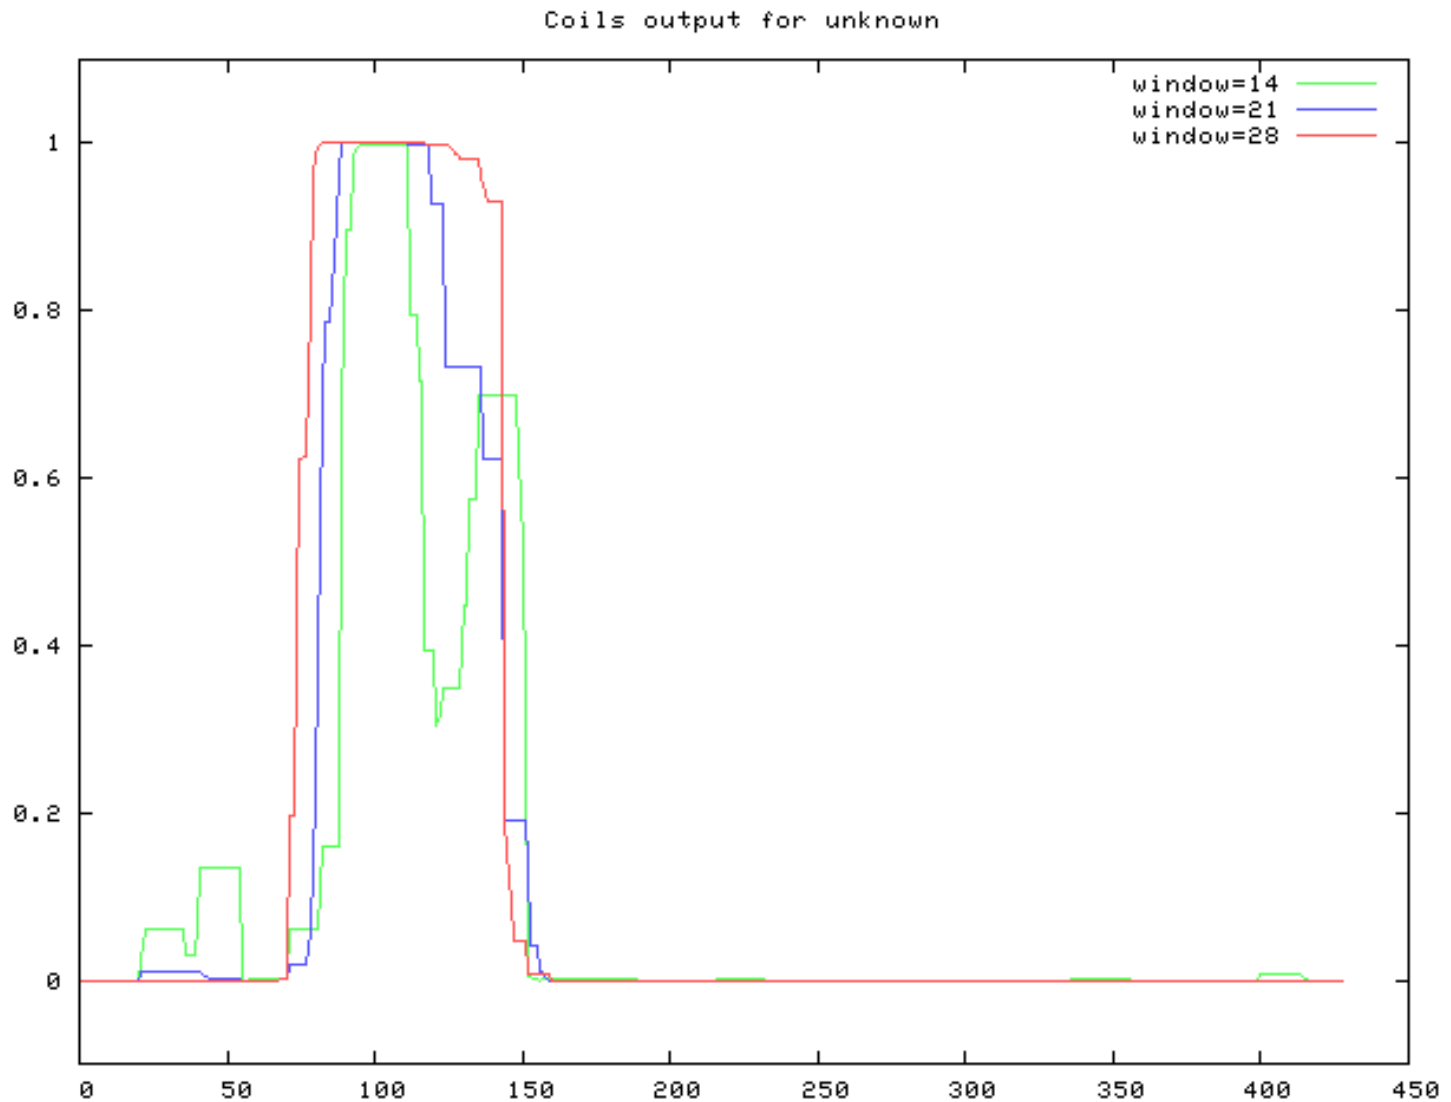

**Figure S2** The coiled-coil domain was predicted within the MoAtg14.

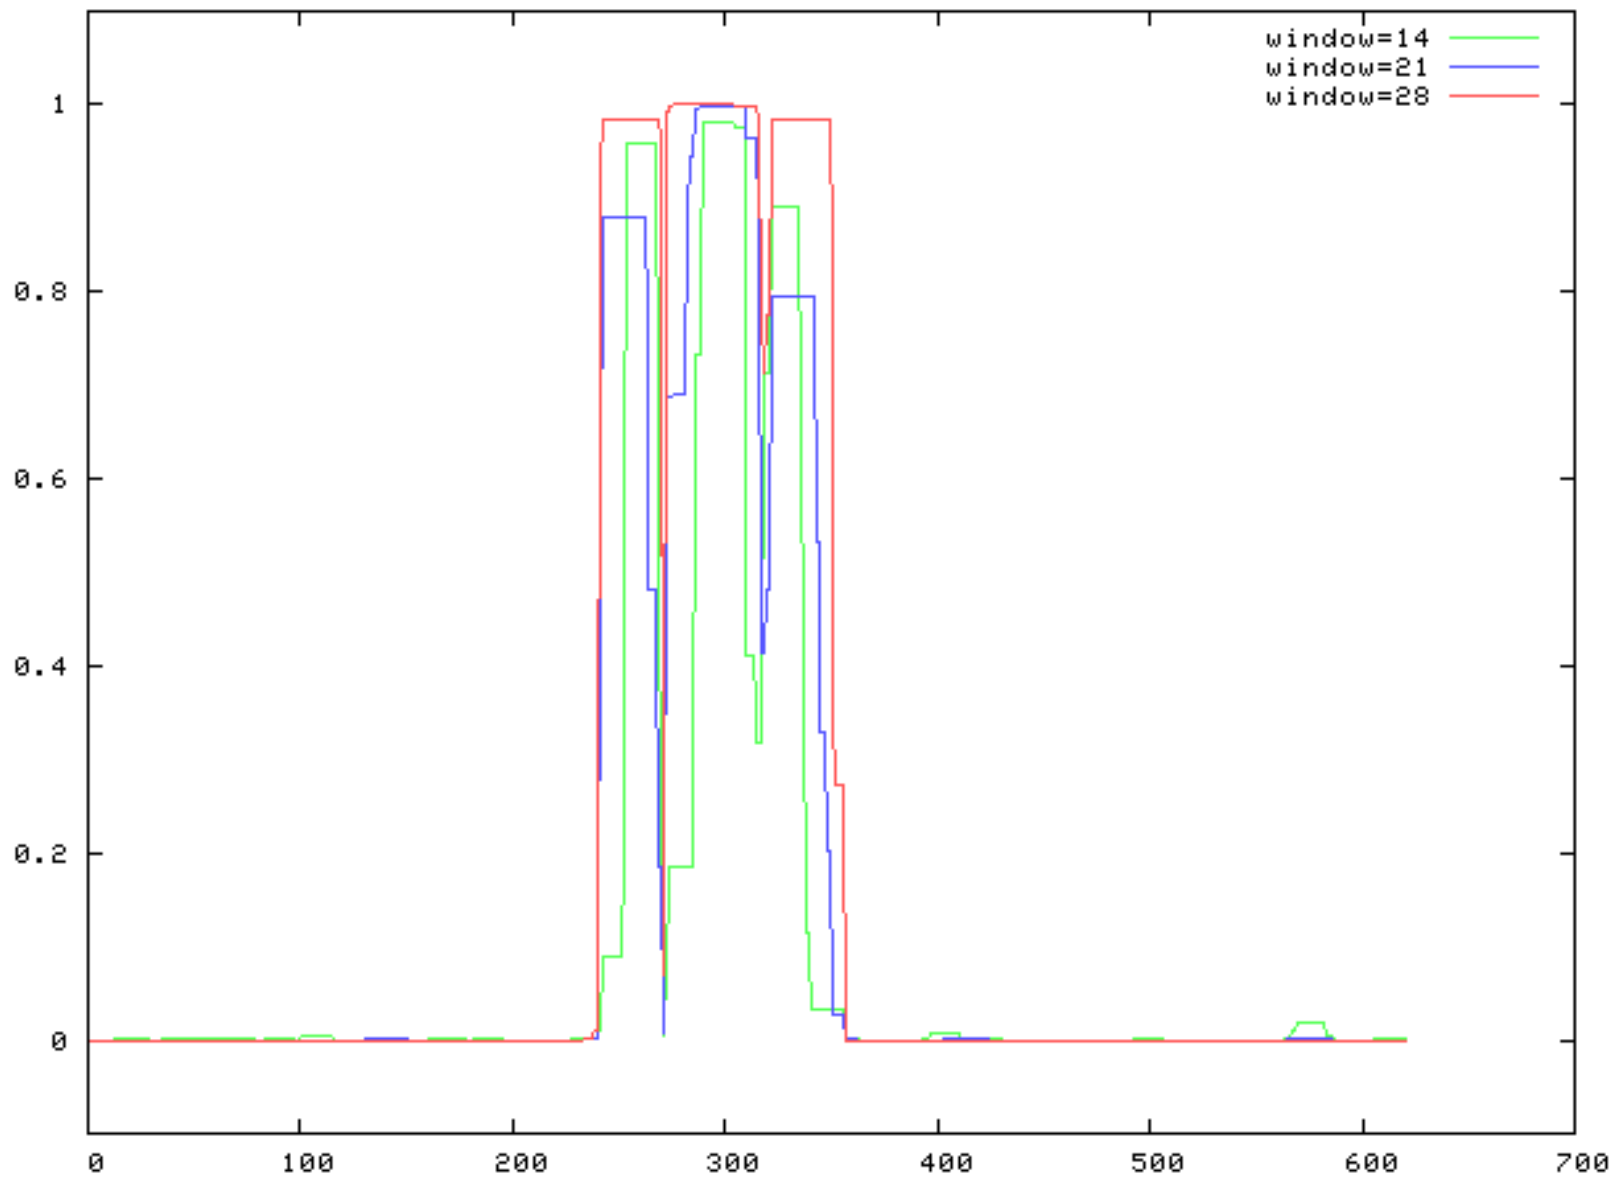

**Figure S3** The coiled-coil domain was predicted within the MoVps38.

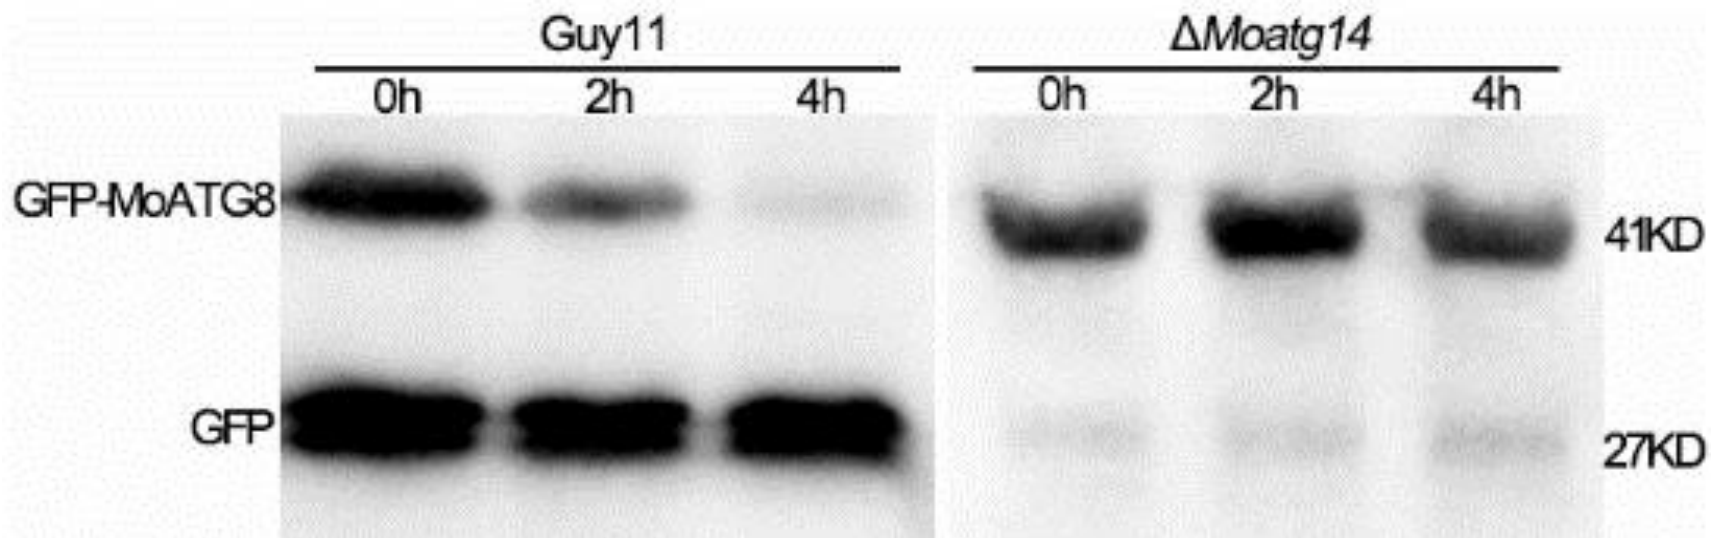

**Figure S4** GFP-MoAtg8 proteolysis assays of *Guy11* and  $\Delta MoAtg14$ . Mycelia were cultured at 25 °C for 48 h in CM liquid medium continuously shaken at 150 rpm. Autophagy was induced after 2 and 4 h of nitrogen starvation. The mycelia were collected at the indicated times, and the mycelial extracts were analyzed by anti-GFP western blotting.

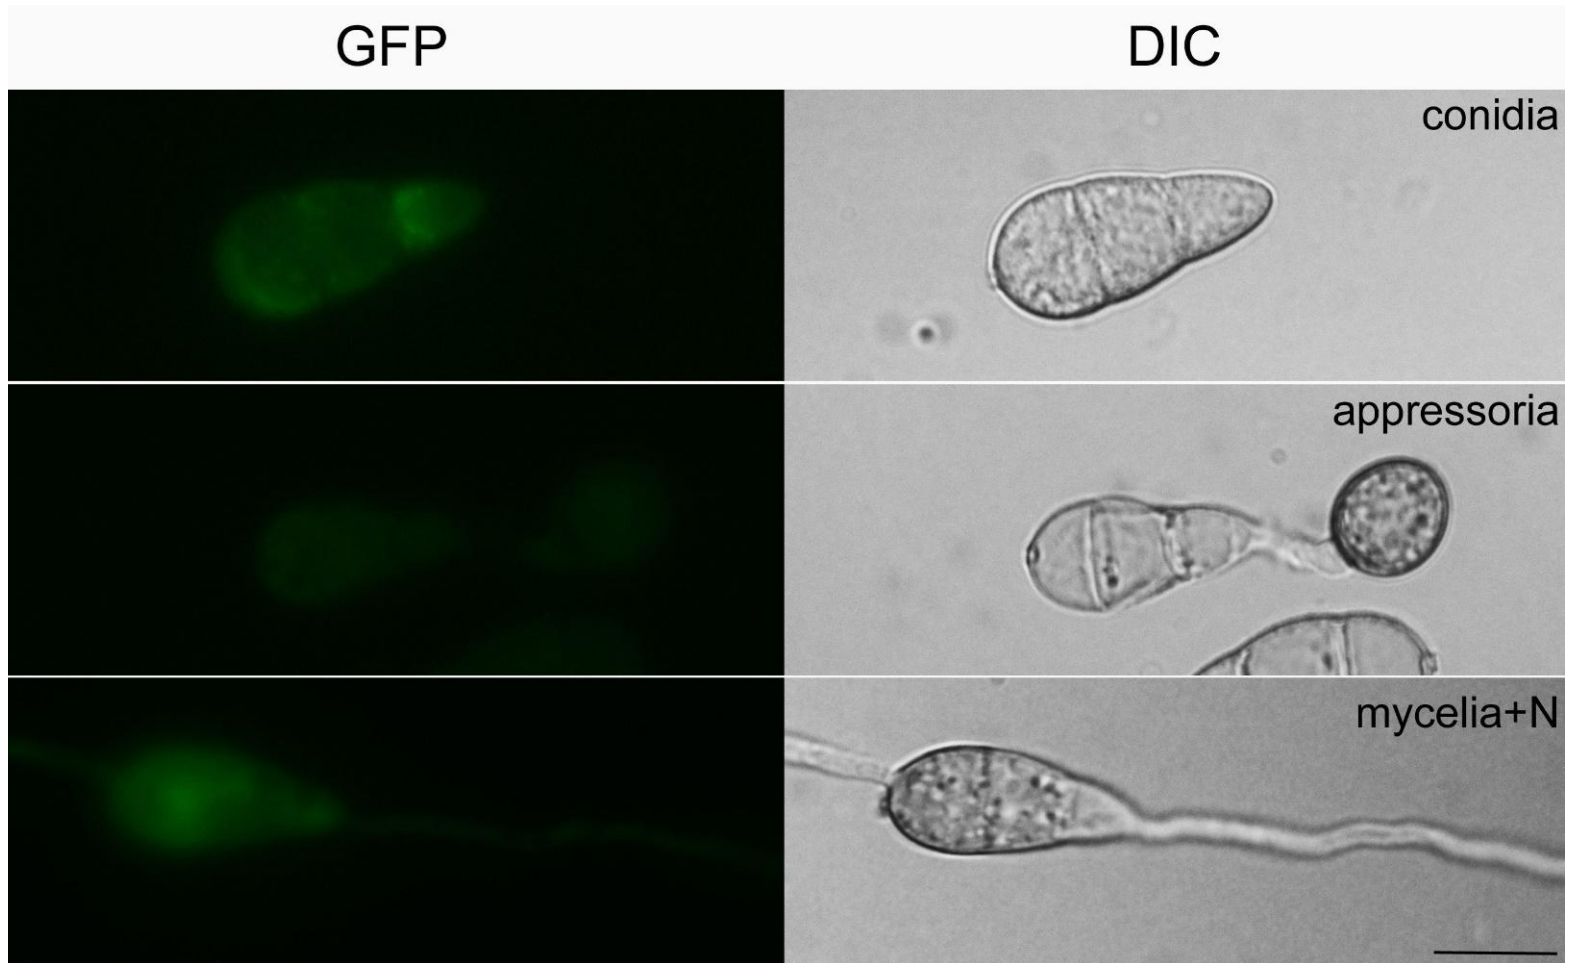

**Figure S5** Subcellular localization of GFP-MoAtg14 in conidia, appressoria and mycelia. Scale bar = 10  $\mu\text{m}$ .
